# Supplementary material for: Spatial distribution and temporal trend of ozone pollution inChina observed with the OMI satellite instrument, 2005–2017
Source: Copernicus journal article supplement (doi:10.5194/acp-2018-1246), 2018-12-10
Supplement: Supplementary file 1 [file acp-2018-1246-supplement.pdf]

### Retrieval sensitivity at different layers for L24

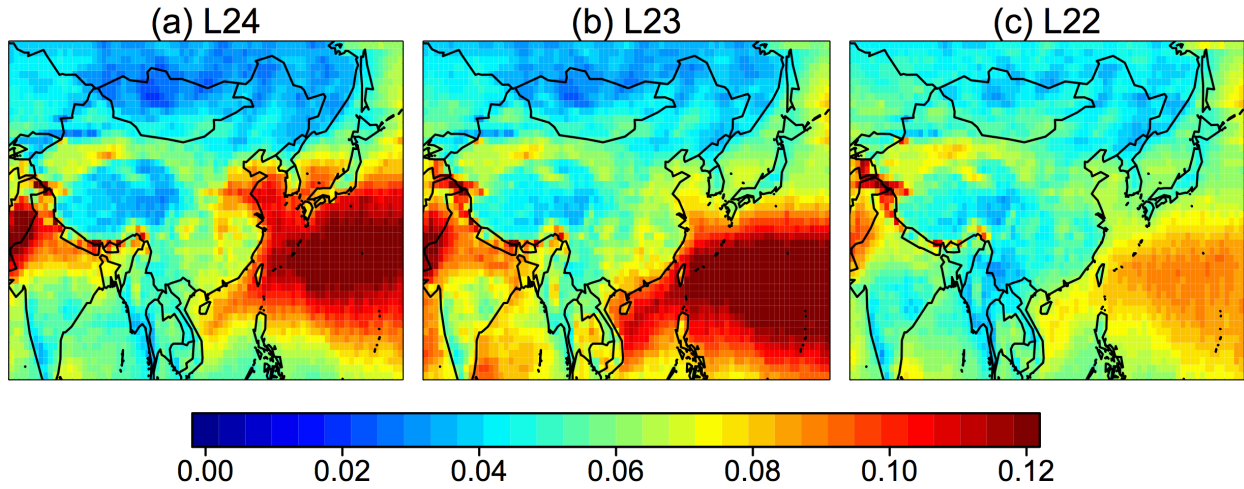

1

2 **Figure S1** The sensitivity of retrieved ozone at L22-L24 to the ozone change at L24, as denoted  
 3 by the columns of AK (Hayashida et al., 2015).

4

### 2005-2017 trends in the frequency of ozone episodes

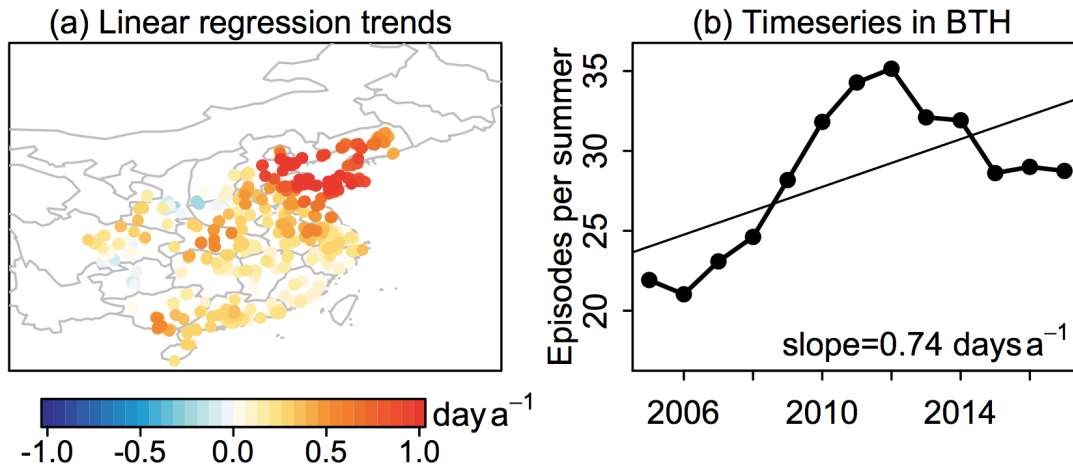

5

6 **Figure S2.** 2005-2017 trends in the number of surface ozone episodes ( $>82$  ppb) per summer as  
 7 inferred from daily OMI observations over China. Results are shown for the 2013-2017 CMEP  
 8 network site locations where the point process model was trained. (a) Spatial distribution of the  
 9 trend as expressed by linear regression on the number of ozone episodes per summer. (b)  
 10 Timeseries of the number of ozone episodes per year when averaged over the Beijing-Tianjin-  
 11 Hebei (BTH) region (Figure 1). The slope is shown inset.

12
