# Supplementary material for: Spatial distribution and temporal trend of ozone pollution inChina observed with the OMI satellite instrument, 2005–2017
Source: Copernicus journal article supplement (doi:10.5194/acp-2018-1246), 2018-12-10
Supplement: Supplementary file [file acp-2018-1246-AC1-supplement.pdf]

1 **Response to referee comments on “Spatial distribution and temporal trend of ozone pollution**  
2 **in China observed with the OMI satellite instrument, 2005–2017”**

3  
4 We thank the referees for their careful reading of the manuscript and the valuable comments. This  
5 document is organized as follows: the Referee’s comments are in *italic*, our responses are in plain  
6 text, and all the revisions in the manuscript are shown in blue. The line numbers in this document  
7 refer to the updated manuscript.  
8

9 **Referee #1**

10  
11 *This paper seeks to quantify surface ozone across China using the SAO OMI tropospheric column*  
12 *ozone product. While I appreciate this effort to quantify such a relationship, the current analysis has*  
13 *not demonstrated a clear and convincing link between the lower/mid-tropospheric OMI retrievals*  
14 *and day-to-day ozone variability at the surface. (1) I realize that the authors are trying to find some*  
15 *signal in OMI that reflects ozone at the surface, but the degrees of freedom are so small, and the*  
16 *sensitivity to surface ozone is so weak, that there’s no real way to distinguish between the signal that*  
17 *comes from the surface and that which comes from 800 or 700 hPa. (2) As presented, the*  
18 *relationship is more likely due to weather pattern variability causing ozone at the surface and in the*  
19 *free troposphere to vary in tandem. (3) Far more work is required, including a thorough evaluation*  
20 *of the OMI product against extensive IAGOS aircraft observations across mainland China, South*  
21 *Korea, Taiwan and Hong Kong. The additional analysis required to convince me that OMI can*  
22 *provide a meaningful evaluation of surface ozone across China goes beyond a standard major*  
23 *revision. My recommendation to the editor is that the paper be rejected to allow the authors*  
24 *adequate time to conduct additional product evaluation. If the expanded analysis can indeed*  
25 *demonstrate sensitivity of OMI to surface ozone then the authors will have the basis for a new*  
26 *manuscript which will make a valuable contribution to ozone monitoring across East Asia.*  
27

28 **Response.** Thanks for the careful reading of our manuscript and raising so many good points. The  
29 feedback has significantly improved our work. We also wish to draw the reviewer’s attention to that  
30 we have revised the title, discussed the limitations of this work and also validated the OMI inferred  
31 ozone trends with surface observations (Figure 6).

32 **New title.** Ability of the OMI satellite instrument to observe surface ozone pollution in China:  
33 application to 2005-2017 ozone trends.

34  
35 Since this is a long comment, we decompose it into three parts and answer each part one by one.  
36

37 (1) Yes, the reviewer made a very good point here that the OMI cannot distinguish the signal that  
38 comes from the surface and from the lower troposphere (e.g. 800 and 700 hPa), given the relatively  
39 low vertical resolution of the retrievals. We have made these changes in the text to reduce the  
40 confusion.  
41

42 **P5 L18.** The correlation of OMI with the MEE surface ozone data likely does not reflect a direct sensitivity of  
43 OMI to surface ozone, which is very weak, but rather a sensitivity to boundary layer ozone extending up to a  
44 certain depth and correlated with surface ozone.

45  
 46 The DOFS depends on what error is assumed in the prior estimate. Since the prior from McPeters et  
 47 al. (2007) has low boundary layer ozone with low associated error then the DOFS would  
 48 underestimate the ability to observe the polluted boundary layer. Now we say this.  
 49 P3L19. Even though a DOFS of 0.3 is still low, it is based on the prior estimate of low boundary layer ozone  
 50 in the McPeters et al. (2007) zonal mean climatology.  
 51  
 52 Also the ozone sonde observations show that the ozone variability in the boundary layer is 80-100%  
 53 higher than in the free troposphere. In more polluted regions like in mega city clusters, this difference  
 54 should be even larger. These results indicate that the boundary layer ozone is more likely to drive the  
 55 daily variability of OMI 850-400 hPa retrievals in regions like South China. We have added the  
 56 following figure.  
 57

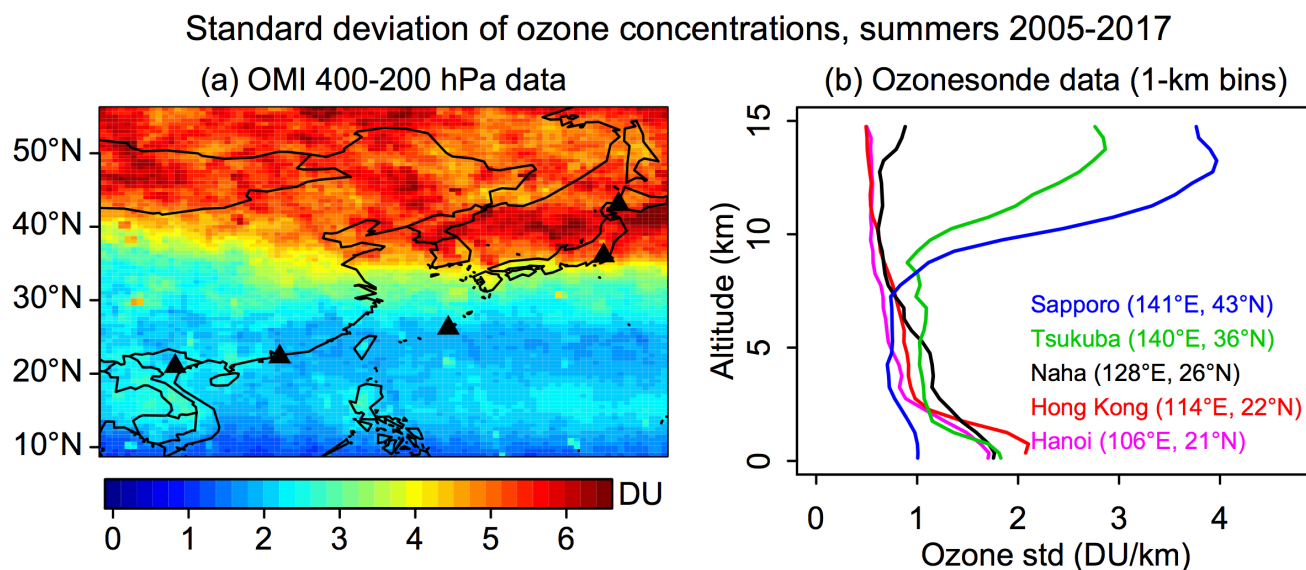

58  
 59 **Figure 4.** (a) Standard deviation of daily OMI 400-200 hPa ozone in East Asia during 2005-2017  
 60 summers. The triangles are the locations of ozonesonde sites with observations during this period. (b)  
 61 Vertical profiles of daily ozone standard deviation in 1-km bins (DU/km) in the ozonesonde data for  
 62 the 2005-2017 summers.  
 63

64 P6 L26. We find that the low correlation of OMI with boundary layer ozone in the northern  
 65 ozonesonde data is due not only to the low DOFS but also to a large variability of ozone in the  
 66 upper troposphere. Figure 4 (left panel) shows the standard deviation of daily OMI 400-200 hPa  
 67 ozone during 2005-2017 summers, indicating that upper tropospheric ozone has much higher  
 68 variability in the north ( $> 34^\circ\text{N}$ ) than in the south. This is related to the location of the jet stream  
 69 and more active stratospheric influence (Hayashida et al., 2015). Figure 4 (right panel) displays the  
 70 vertical profiles of ozone standard deviations for the five ozonesonde sites. For the two sites north  
 71 of  $34^\circ\text{N}$ , the ozone variability becomes very large above 8 km. Since the OMI 850-400 hPa  
 72 retrieval also contains information from above 400 hPa, this upper tropospheric variability causes a  
 73 large amount of noise that masks the signal from boundary layer variability. For the three sites  
 74 south of  $34^\circ\text{N}$ , the ozone variability in the boundary layer is much higher than in the free

75 troposphere and the upper tropospheric ozone variability still remains low even above 8 km. In the  
 76 rest of this paper we focus our attention on ozone episodes and the long-term trends in southern  
 77 China (south of 34°N).

78  
 79 (2) We thank the reviewer for pointing out this issue. But based on our analysis, the weather  
 80 patterns are insufficient to explain the observed relationship. We have conducted a sensitivity  
 81 experiment and made these changes in the text.

82 P6 L15. The correlation between boundary layer ozone pollution and the OMI ozone retrievals  
 83 could be due in part to correlation between boundary layer and mid-tropospheric ozone, considering  
 84 that both tend to be driven by the same weather systems. We used the ozonesonde data to examine  
 85 what correlation with boundary layer (950-850 hPa) ozone would be observed if OMI were  
 86 sensitive only to the free troposphere at ~500 hPa (where its sensitivity is maximum, Figure 3c) and  
 87 not to the boundary layer. In that case the correlation coefficient  $R_{1,3}$  of boundary layer ozone and  
 88 the OMI 850-400 hPa retrievals would be given by (Vos, 2009):

$$89 \quad R_{1,3} = R_{1,2}R_{2,3} \pm \sqrt{(1 - R_{1,2}^2)(1 - R_{2,3}^2)} \quad (2)$$

90 where  $R_{1,2}$  is the correlation coefficient between boundary layer and 500 hPa ozone in the  
 91 ozonesonde data, and  $R_{2,3}$  is that between 500 hPa ozone and the OMI 850-400 hPa retrievals. As  
 92 seen from Figure S4,  $R_{1,3}$  at the five sonde sites is only ~0.2, implying that direct sensitivity to the  
 93 boundary layer dominates the correlation of OMI with surface ozone at least in southern China.  
 94 Further evidence for this is the ability of OMI to detect the ozone enhancements in megacity  
 95 clusters (Figure 1).

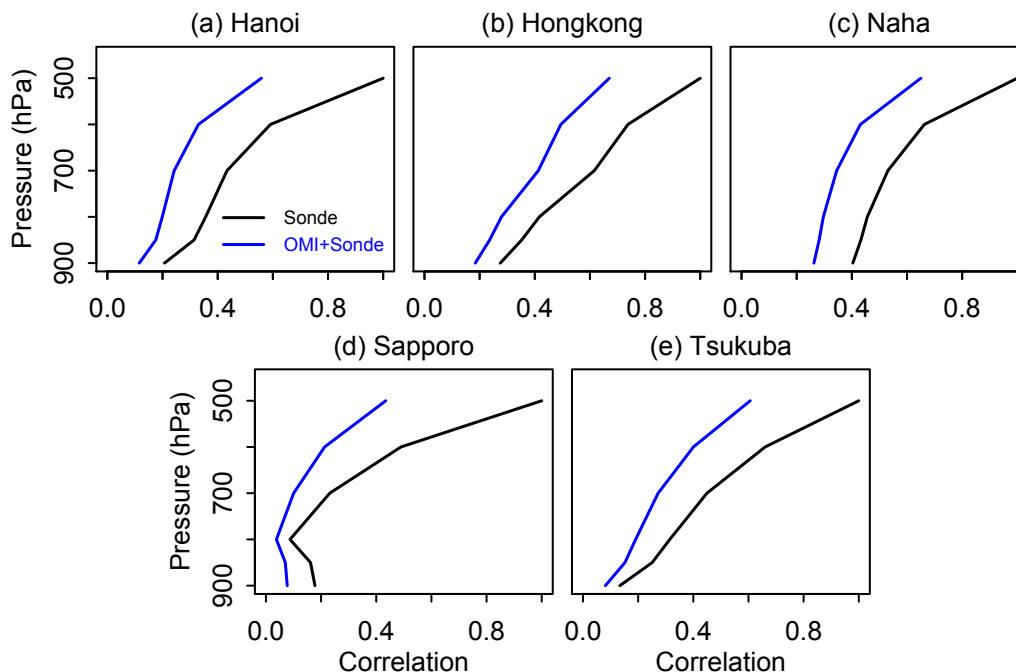

96  
 97 **Figure S4.** Correlation of OMI 850-400 hPa ozone and the boundary layer ozone assuming that the  
 98 OMI were sensitive only to the free troposphere at ~500 hPa (where its sensitivity is maximum,  
 99 Figure 3c) and not to the boundary layer. The black line is the correlation of ozone at different

100 pressure levels with 500 hPa ozone in the sonde observations. The blue line is the estimated  
 101 correlation of OMI 850-400 hPa with ozone at different layers if the satellite can only detect the  
 102 signal at 500 hPa but not from other layers, as calculated using Equation 2. See text for more details.  
 103

104 (3) We have processed all IAGOS aircraft observations in East Asia during 2005-2017 summers  
 105 and we only find 54 profiles in 8 airports that can be used to validate the OMI. Given so few  
 106 profiles, it is unlikely to evaluate the long-term correlation of surface and mid-tropospheric ozone  
 107 at each airport. But combining all profiles together, the temporal correlation coefficients of the 950  
 108 hPa ozone and 850-400 hPa OMI ozone is 0.59. These results are also consistent with what we find  
 109 in the Hong Kong sonde site (Figure 2). We have made these changes.  
 110

111 P6 L9. We applied the same daily correlation analysis to the other ozonesonde datasets and IAGOS  
 112 aircraft measurements during 2005-2017 summers. For the 54 IAGOS vertical profiles coincident  
 113 with OMI observations, the correlation coefficient of the 950 hPa in situ ozone and 850-400 hPa  
 114 OMI ozone is  $R = 0.59$  ( $p < 0.05$ ) (Figure S2).

Ozone profiles, IAGOS vs. OMI, JJA 2005-2017

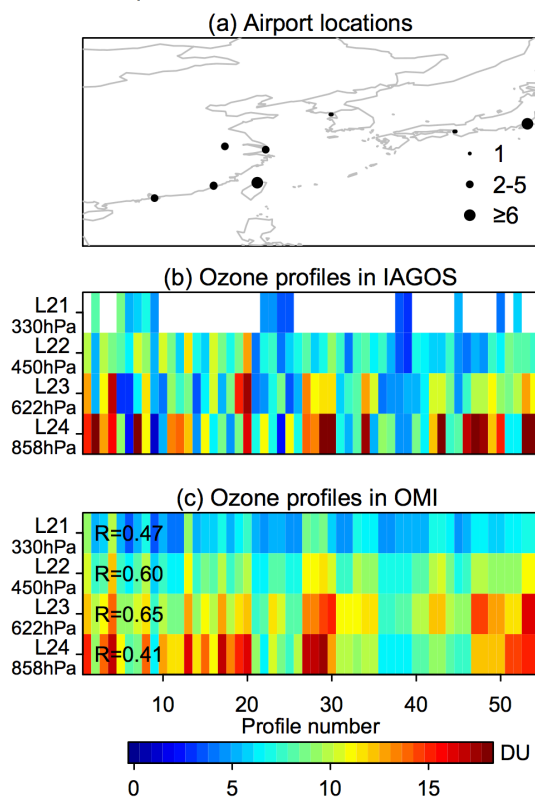

115

116 **Figure S2.** (a) Location and the number of tropospheric profiles at each airport in IAGOS that are  
 117 coincident with OMI retrievals. We only select these profiles between 12-15 local time. (b) Ozone  
 118 profiles from IAGOS, but mapped to OMI layers. The missing data at L21 is in part because we  
 119 only select pixels that are within 200 km from the airport on the flight path. (c) OMI ozone profiles  
 120 coincident with the ozonesondes. The correlations of unsmoothed 950 hPa ozone data in IAGOS  
 121 with the OMI retrievals for different levels are shown inset. The correlation with 850-400 hPa OMI  
 122 ozone is 0.59 ( $p < 0.05$ )

123  
124 *Further comments:*  
125  
126 *When I read the title and abstract I was under the impression that the authors had made a new*  
127 *breakthrough regarding the detection of surface ozone using OMI. It seemed like the instrument*  
128 *could actually detect ozone at the surface and the detection was so good that daily ozone variability*  
129 *at any given surface site could be determined with a precision of +/- 10.7 ppb. But when I read the*  
130 *full paper I learned that this is not the case.*

131  
132 *The premise that lower/mid-tropospheric OMI ozone retrievals are closely associated with surface*  
133 *ozone is not shown in a convincing manner. The initial correlation of:  $[O_3] = 8.9 \Delta\Omega + 15.8 \pm 10.7$*   
134 *appears to be driven entirely by the latitudinal gradient of ozone at the surface and in the mid-*  
135 *troposphere. Just because surface and OMI ozone have similar latitudinal gradients, when averaged*  
136 *over several years, does not mean that the mid- to lower troposphere can tell us how ozone varies at*  
137 *the surface from day to day. A better test of the relationship is to focus on a narrow latitude range.*  
138 *This is done in Figure 3, for daily observations, where we can see that the correlation is very low*  
139 *above five urban regions. For the region of Beijing the correlation is only  $R=0.27$  which corresponds*  
140 *to an  $r$ -squared value of 0.07, which means that the variation in OMI only explains 7% of the ozone*  
141 *variability at the surface. The best case is made by the Wuhan region, but even here  $R=0.53$ , which*  
142 *means OMI only explains 28% of the surface ozone variability. Figure 3 shows that OMI is only*  
143 *weakly correlated with surface ozone and provides no convincing argument that the retrieval is*  
144 *sensitive to surface ozone. The weak correlation is probably just due to weather patterns causing*  
145 *surface and lower to mid- tropospheric ozone to vary in tandem.*

146  
147 **Response.** Yes, the reviewer has made a very good point here that the satellite has a lot of noise. This  
148 is a common problem when we use satellite data. But noisy data still contains information, and we  
149 can reduce the noise by either temporally averaging the data over multiple years, or training the  
150 model with a lot of data together. In our study, we tried both ways. When we average the data over a  
151 five-year period, the OMI 850-400 hPa ozone displays a strong correlation ( $R=0.73$ ) with the surface  
152 observations. When we fit all the daily data in eastern China together, we find the extreme value  
153 model can well simulate the distribution of high ozone concentrations. We also find the resulting  
154 model can accurately estimate the probability of higher thresholds, which is a strong signal that our  
155 extreme value model is well fitted.

156  
157 The reviewer is correct that our old manuscript indeed overpromised the value of OMI data,  
158 especially in the northern China. Due to the stronger jet wind activities and more active stratosphere-  
159 troposphere exchange in the north, the upper tropospheric ozone there has much higher daily  
160 variability, making OMI 850-400 hPa ozone less reliable in predicting the daily episode and inferring  
161 the long-term trends. The strong jet wind also means these regions are very sensitive to global  
162 background. At the same time, OMI has relatively low sensitivity in the north. So in our revised  
163 manuscript, we don't fit the extreme value model or predict the trends in the north. We have added a  
164 [new figure 4](#) and more discussions at [P6L26-P7L6](#). Based on reviewer's suggestion, we have  
165 changed the title (see new title) and also discussed the limitations of this work (see many blue

166 highlighted text in the revised manuscript).

167  
 168 But the OMI data should still be useful in south China for these reasons. First, OMI has higher  
 169 sensitivity in the South, and the daily correlation of surface ozone and OMI 850-400 retrievals is  
 170 statistically significant for most sites (Figure 1). Second, the upper tropospheric ozone variability is  
 171 much smaller and the boundary ozone variability can be a strong modulator of OMI 850-400 hPa  
 172 ozone variability (new figure 4). Third, the inferred long-term trends of surface ozone from OMI  
 173 fairly agree with these from TOAR sites (Figure 6).

174  
 175 We also make it clear we have removed the latitude-dependent background.  
 176 P3 L23. To remove this gradient and also any long-term uniform drift in the data, we subtract the monthly  
 177 mean Pacific background (150°E-150°W) for the corresponding latitude and month  
 178 P4 L22. After subtracting the North Pacific background for the corresponding latitude in month, we obtain the  
 179 OMI ozone enhancements shown in Figure 1d.  
 180 P4 L23. The spatial correlation coefficient between the OMI ozone enhancements and the MEE surface  
 181 network is  $R = 0.73$  over eastern China. The correlation is driven in part by the latitudinal gradient but also by  
 182 the enhancements in the large megacity clusters identified as rectangles in Figure 1b. Thus the correlation  
 183 coefficient is  $R = 0.55$  for the 26-34°N latitude band including YRD, SCB, and Wuhan.

184  
 185  
 186 *In a related comment, do the authors think that any correlation between ozone at the surface and*  
 187 *ozone in the lower/mid troposphere is linked because of similar photo- chemical processes, or is the*  
 188 *correlation just a coincidence due to meteorology? For example we know that in southern China the*  
 189 *ozone at the surface varies strongly with the strength of the summertime Asian monsoon. When*  
 190 *transport is from the south then the relatively clean air masses from the tropical Pacific bring air*  
 191 *that is low in ozone, both at the surface and in the lower-mid troposphere. But when the monsoon*  
 192 *winds weaken, mid-latitude air is allowed to move back into the region of southern China, bringing*  
 193 *higher ozone to the lower and mid-troposphere. At the same time, the flow of clean air from the south*  
 194 *also ceases at the surface, allowing ozone to build up in the polluted air masses from mainland*  
 195 *China. Under this scenario ozone in the mid- troposphere is correlated with ozone at the surface*  
 196 *even if the two layers are isolated from each other by strong temperature inversions.*

197  
 198 **Response.** Thanks for pointing out this issue. But meteorology is insufficient to explain the observed  
 199 correlation of surface ozone and OMI 850-400 hPa ozone. Please check L79-102 of this response  
 200 letter for more details (or P5 L15-25 in the main text).

201  
 202  
 203 *OMI ozone could be compared to long-term ozone monitoring sites in rural areas which would be a*  
 204 *better comparison than the urban data from the new Chinese monitoring network. It would be very*  
 205 *helpful to see time series of daily OMI values (when avail- able) and corresponding surface*  
 206 *observations from the following sites: Mt Tai – data can be obtained from Prof. Likun Xue, Shandong*  
 207 *University [Sun et al., 2016] Hok Tsui – located on the south coast of Hong Kong, data can be*  
 208 *obtained from Prof. Tao Wang, Hong Kong Polytechnic [Wang et al., 2017] Shangdianzi – see Ma et*  
 209 *al., 2016 LongFengShan – located in northeastern China. Contact Dr. Xiaobin Xu at the China*



210 Meteorological Administration: [xiaobin\\_xu@189.cn](mailto:xiaobin_xu@189.cn) LinAn – Near Shanghai, Contact Dr. Xiaobin  
 211 Xu at the China Meteorological Administration: [xiaobin\\_xu@189.cn](mailto:xiaobin_xu@189.cn) Xi-angGeLiLa – in south  
 212 central China, Contact Dr. Xiaobin Xu at the China Meteorological Administration:  
 213 [xiaobin\\_xu@189.cn](mailto:xiaobin_xu@189.cn)

214  
 215 **Response.** We have obtained the Hong Kong site observations from Prof. Tao Wang from the above  
 216 list. And we have also used the TOAR dataset to validate our model. We find that the OMI inferred  
 217 ozone trends are fairly consistent with these long term surface records.

218 P1 L21. Comparison of 2005-2009 and 2013-2017 OMI data indicates that mean summer afternoon surface  
 219 ozone in southern China (including urban and rural regions) has increased by 3.5 ppb over the 8-year period  
 220 and the number of episode days per summer has increased by 2.2 (as diagnosed by an extreme value model),  
 221 fairly consistent with the few long-term surface records.

222 P9 L6. We compared the OMI trends in Figure 6 to the trends of MDA8 ozone and number of high-ozone  
 223 days reported by the long-term TOAR sites (Schultz et al., 2018) and our own analysis for the Hok Tsui  
 224 station in Hong Kong (Wang et al., 2009). For Lin'an, Hong Kong, and the 5 sites in Taiwan, the changes of  
 225 mean ozone concentrations from 2005-2009 to 2013-2017 are 1.1, 2.3, and  $-0.18 \pm 2.2$  ppbv (standard deviation  
 226 among the 5 sites) as estimated from OMI, compared to 0.7, 5.6 (or 5.8 in Hok Tsui station), and  $-0.75 \pm 3.4$   
 227 ppbv for MDA8 ozone at the TOAR sites. The changes in the number of ozone episodes per summer are 1.2,  
 228 1.9, and  $-0.17 \pm 0.74$  days in OMI, compared to 2.1, 1.8 (or 2.1 in Hok Tsui station), and  $-3.5 \pm 3.9$  days at the  
 229 TOAR sites. These OMI inferred trends are fairly consistent with the long-term records available from surface  
 230 sites.

### Changes in summertime surface ozone pollution inferred from OMI (2005-2009 to 2013-2017)

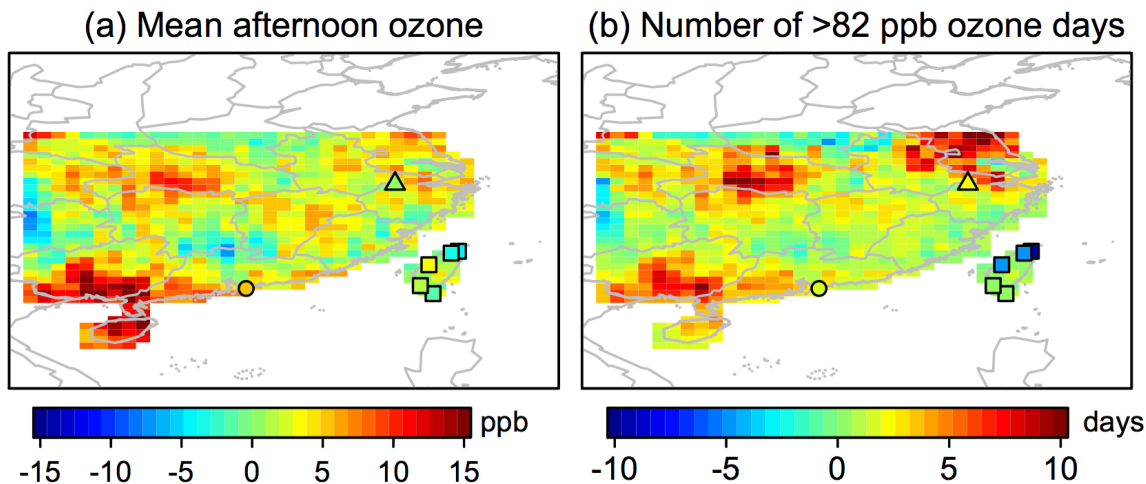

231  
 232 **Figure 6.** Changes in surface ozone pollution in China between 2005-2009 and 2013-2017 as  
 233 inferred from OMI afternoon observations at around 13:30 local time. (a) Change in mean summer  
 234 afternoon concentrations, obtained from the difference in the mean OMI enhancements at 850-400  
 235 hPa and applying equation (1). Also shown with symbols are observed changes in mean MDA8  
 236 ozone from in situ observations in Lin'an, Hong Kong, and Taiwan reported by TOAR (Schultz et  
 237 al., 2018). Because the TOAR observations are only reported for 2005-2014, we estimate the  
 238 changes from 2005-2009 to 2013-2017 on the basis of the reported linear trends during 2005-2014  
 239 (ppb a<sup>-1</sup>). The change of 12-15 LT ozone at the Hok Tsui station in Hong Kong is 5.8 ppb. (b)

240 Change in the number of high-ozone days ( $> 82$  ppb) per summer, calculated by applying the  
241 probability of exceeding 82 ppb (equation 8) to the daily OMI enhancements. Also shown with  
242 symbols are observed changes of the number of days with MDA8 ozone exceeding 80 ppb at the  
243 TOAR sites, similarly adjusted as the change from 2005-2009 to 2013-2017. The change in the  
244 number of days with 12-15 LT ozone exceeding 82 ppbv at the Hok Tsui station in Hong Kong is  
245 2.1 days.

246  
247 *Ozone at the surface and in the mid-troposphere varies greatly with transport path- way and abrupt*  
248 *changes in air masses, and recent studies have shown that ozone in China varies with meteorology*  
249 *[Pu et al., 2017; Zhao et al., 2018]. The authors are aware of this phenomenon as their previous*  
250 *work has explored the impact of climate variability on ozone. Therefore I'm surprised that the*  
251 *authors didn't first explore how surface ozone across China varies with meteorology, such as surface*  
252 *temperatures (or temperature at 850 hpa) [Pusede et al., 2015], or with the height of the 500 hPa*  
253 *surface [Reddy et al., 2016], both of which correlate quite well with surface ozone. The authors*  
254 *should first determine the correlation between surface ozone and meteorology, and then compare*  
255 *these results to what they find from OMI ozone. Does OMI give more information on surface ozone*  
256 *than basic meteorology? Given that reanalysis data are available for all of China under all weather*  
257 *conditions (no cloud screening) I would think that the meteorology would perform better than OMI.*  
258 *If OMI performs less well than meteorology, is there any reason to use OMI to try to predict surface*  
259 *ozone, when meteorological analyses are available everywhere and at all times?*

260  
261 **Response.** Our focus is to evaluate the OMI observation capability, not to analyze the correlation of  
262 ozone with meteorological variables which has been done before and would not capture the  
263 variability in ozone driven by emissions. The reviewer makes a good point that mid-tropospheric and  
264 surface ozone may respond similarly to meteorological conditions, which may in turn contribute to  
265 the correlation of OMI with surface ozone. We now address this point in Section 4 by analysis of the  
266 ozonesonde data (P6 L15-25 with new Figure S4). We also mention this in other parts of the  
267 manuscript.

268 P5L18. The correlation of OMI with the MEE surface ozone data likely does not reflect a direct sensitivity of  
269 OMI to surface ozone, which is very weak, but rather a sensitivity to boundary layer ozone extending up to a  
270 certain depth and correlated with surface ozone.

271 P9L25. To better understand the correlation of OMI with surface ozone we examined vertical ozone profiles  
272 from Hong Kong and other ozonesondes, and from the IAGOS commercial aircraft program. Some of the  
273 correlation is driven by similar meteorology influencing ozone in the mid-troposphere (where OMI sensitivity  
274 is maximum) and the boundary layer, but most of the correlation is driven by direct sensitivity to the boundary  
275 layer.

276  
277 *Another necessary analysis is to see if in situ observations of ozone in the mid- troposphere are*  
278 *correlated with surface ozone. I realize that the authors did look at ozonesonde profiles above Hong*  
279 *Kong, but they are not very frequent and they don't tell us anything about ozone in other parts of*  
280 *China, especially in the highly polluted North China Plain. The IAGOS program has hundreds of*  
281 *profiles above East Asia since 1995. As shown by Ding et al. [2005] and by Gaudel et al. [2018]*  
282 *ozone in sum- mertime in the boundary layer is much greater than ozone in the mid-troposphere. The*  
283 *difference is due to very strong ozone production in the boundary layer, versus distant source regions*



284 *for ozone in the mid-troposphere. If the authors conducted a trans- port study for ozone in the mid-*  
 285 *troposphere they would find that very little of the air in this layer comes from the surface of China.*  
 286 *Probably 80-90% of the mid-tropospheric above China air has either been in the mid-troposphere*  
 287 *for days, or it comes from the boundary layer far upwind of China. The authors can freely access*  
 288 *hundreds of com- mercial aircraft profiles of ozone and carbon monoxide above mainland China,*  
 289 *Hong Kong, Taiwan and South Korea from the IAGOS database. They can then apply the OMI*  
 290 *averaging kernel to the profiles and determine the relationship between IAGOS ozone in the mid- and*  
 291 *lower troposphere to ozone at the surface. Does IAGOS ozone in the mid-troposphere correlate with*  
 292 *ozone at the surface? Is the correlation any better than when surface ozone is correlated with*  
 293 *meteorology? Then compare the IAGOS relationship to the OMI relationship. Does OMI perform*  
 294 *any better than IAGOS?*

295 **Response.** We only find 54 profiles that can be used to validate the OMI data. This is because the  
 296 OMI crossing time is 13:30 local time and we have to use observations close to this time window.  
 297 We have added more discussion in the text.

298 P6 L9. We applied the same daily correlation analysis to the other ozonesonde datasets and IAGOS aircraft  
 299 measurements during 2005-2017 summers. For the 54 IAGOS vertical profiles coincident with OMI  
 300 observations, the correlation coefficient of the 950 hPa in situ ozone and 850-400 hPa OMI ozone is  $R = 0.59$   
 301 ( $p < 0.05$ ) (Figure S2).

Ozone profiles, IAGOS vs. OMI, JJA 2005-2017

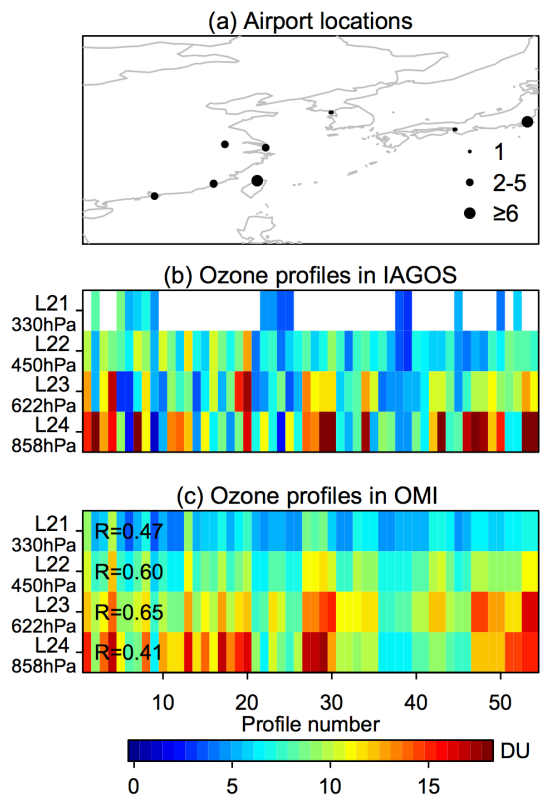

302  
 303 **Figure S2.** (a) Location and the number of tropospheric profiles at each airport in IAGOS that are  
 304 coincident with OMI retrievals. We only select these profiles between 12-15 local time. (b) Ozone  
 305 profiles from IAGOS, but mapped to OMI layers. The missing data at L21 is in part because we  
 306 only select pixels that are within 200 km from the airport along the flight path. (c) OMI ozone

307 profiles coincident with the ozonesondes. The correlations of unsmoothed 950 hPa ozone data in  
 308 IAGOS with the OMI retrievals for different levels are shown inset. The correlation with 850-400  
 309 hPa OMI ozone is 0.59 ( $p < 0.05$ )

310  
 311 *Figure 5 shows surface ozone trends across China which were derived from the OMI ozone product.*  
 312 *The strongest trends are in the far north of China and in the far south of China. Based on the summer*  
 313 *OMI trends (2005-2015) reported by the Tropospheric Ozone Assessment Report in supplementary*  
 314 *Figure S-24 of Gaudel et al. [2018], OMI has a strong trend across southern China but no trend*  
 315 *across northern China. Therefore I don't understand how Figure 5 can show trends across northern*  
 316 *China. It would be helpful to include a map that shows the OMI trends across China.*

317 **Response.** Thanks for the careful reading. The authors who plotted Figure S24 in the TOAR report  
 318 (Gaudel et al., 2018) are also coauthors of this work. The difference of trends in northern China  
 319 arises from these reasons. First, we use the 850-400 hPa ozone but Gaudel et al. (2018) uses the  
 320 tropospheric column ozone. Second, we use different methods to remove the background. Third, we  
 321 have removed the low quality L2 data but Gaudel et al. (2018) kept all of them. Now we have this  
 322 new figure in the supplement.

Changes in OMI 850-400 hPa ozone  
 (2005-2009 to 2013-2017)

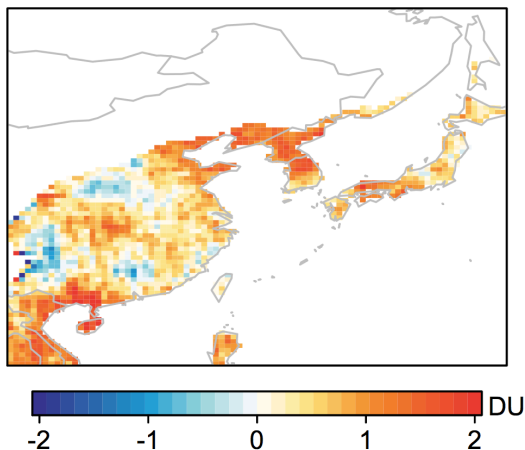

323  
 324 **Figure S5.** Difference of the mean OMI enhancements at 850-400 hPa from 2005-2009 to 2013-  
 325 2017 after correcting the Pacific background. Data are only shown for regions with DOFS below  
 326 400 hPa (Figure 1a) greater than 0.30.
